# Supplementary material for: The study of multivalent carbohydrate–protein interactions by bio-layer interferometry
Source: PubMed Central journal article supplement — Org Biomol Chem. 2018 Sep 28;16(46):8899–903. doi: 10.1039/c8ob01664j (PMC6289105; doi:10.1039/c8ob01664j), 2018-09-28
Supplement: OB-016-C8OB01664J-s001.pdf [file OB-016-C8OB01664J-s001.pdf]

## Study of multivalent carbohydrate-protein interactions by Bio-Layer Interferometry

Eugénie Laigre,<sup>a</sup> David Goyard,<sup>a</sup> Claire Tiertant,<sup>a</sup> Jérôme Dejeu,<sup>a\*</sup> Olivier Renaudet<sup>a\*</sup>

[a] Univ. Grenoble Alpes, CNRS, DCM UMR 5250, F-38000 Grenoble, France

\*Corresponding authors: [jerome.dejeu@univ-grenoble-alpes.fr](mailto:jerome.dejeu@univ-grenoble-alpes.fr) and [olivier.renaudet@univ-grenoble-alpes.fr](mailto:olivier.renaudet@univ-grenoble-alpes.fr)

### Structures of tetravalent negative controls

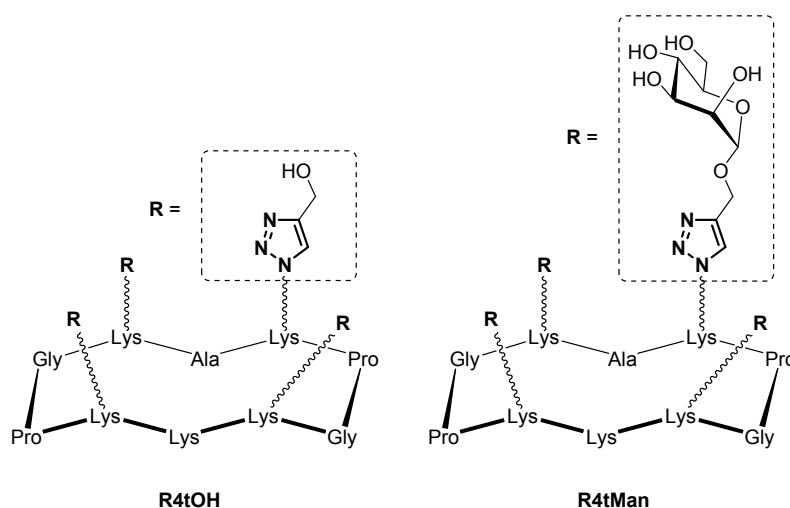

### Experimental procedure

**Bio Layer Interferometry (BLI).** BLI sensors coated with streptavidin (SA sensors) were purchased from Forte Bio (PALL). They were immersed 10 minutes in buffer solution (PBS 1x pH 7,4) before functionalization to remove the protective sucrose layer. Then, the sensors were dipped for 15 minutes in lectin solutions at 1  $\mu$ M and rinsed in buffer solution for 10 minutes. The functionalized sensors were dipped in sugar solutions at different concentrations and, after each association step, rinsed in the buffer solution. The experimental parameters are reported in Table SI-1. For the strongest ligand-lectin interactions, a solution of commercial GalNAc at 1M was used to regenerate the sensor. Reference sensors not functionalized with the lectin were used as blank to subtract the non-specific adsorption to the raw data. The sensorgrams were fitted using a heterogeneous model (2:1). The reported values are obtained from the average of representative independent experiments, and the errors provided

are standard deviations from the mean. Each experiment was repeated at least three times for the multivalent ligands and two times for the references and negative controls.

| Conjugate | Association time (s) | Dissociation time (s) | Concentration                      | Number of sensors | Sensor type |
|-----------|----------------------|-----------------------|------------------------------------|-------------------|-------------|
| GalNAc    | 200                  | 300                   | 1, 0.75, 0.5, 0.25, 0.05, 0.01 mM  | 1                 | SA<br>SSA   |
| <b>1</b>  | 200                  | 300                   | 40, 20, 7.5, 2.5, 0.5, 0.1 $\mu$ M | 1                 | SA          |
| <b>3</b>  | 200                  | 300                   | 40, 20, 7.5, 2.5, 0.5, 0.1 $\mu$ M | 1                 | SA          |
| <b>2</b>  | 200                  | 300                   | 40, 20, 7.5, 2.5, 0.5, 0.1 $\mu$ M | 1                 | SA          |
| <b>4</b>  | 200                  | 300                   | 40, 20, 7.5, 2.5, 0.5, 0.1 $\mu$ M | 1                 | SA          |
| <b>5</b>  | 2000                 | 2000                  | 200, 150, 100, 50, 25, 10 nM       | 6                 | SA          |
| <b>6</b>  | 2000                 | 2000                  | 200, 50, 25, 10, 5, 1 nM           | 6                 | SA          |
| <b>8</b>  | 2000                 | 2000                  | 200, 50, 25, 10, 1, 0.5 nM         | 6                 | SA          |
| <b>7</b>  | 2000                 | 2000                  | 200, 50, 25, 10, 5, 1 nM           | 6                 | SA          |
| R4tOH     | 200                  | 300                   | 40 and 20 $\mu$ M                  | 1                 | SA          |
| R4tMan    | 200                  | 300                   | 40 and 20 $\mu$ M                  | 1                 | SA          |

Table SI-1: Experimental parameters used to evaluate the lectin-ligand interaction

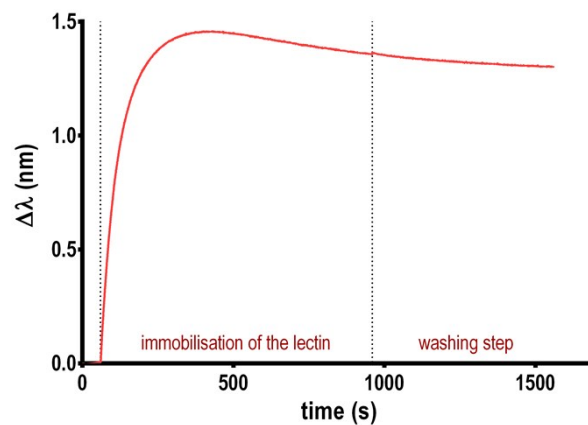

Figure SI-1: Immobilization of the HPA lectin on SA sensor by streptavidin-biotin interaction

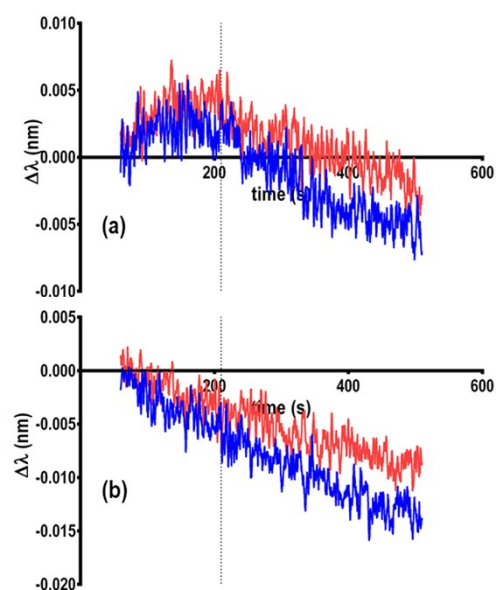

Figure SI-2: Sensorgrams obtained for : (a) R4tMan and (b) R4tOH

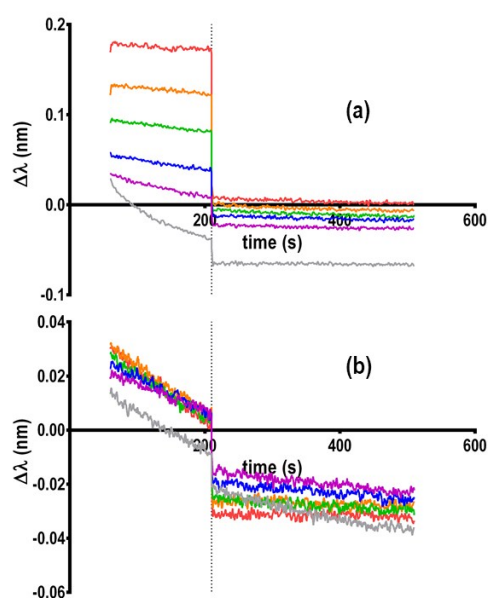

Figure SI-3: Sensorgrams obtained for commercial GalNAc by using: (a) SA and (b) SSA sensors.

| Molecule | $K_D$ (nM)     | $k_{on}$ ( $10^4 M^{-1}.s^{-1}$ ) | $k_{off}$ ( $s^{-1}$ )                    |
|----------|----------------|-----------------------------------|-------------------------------------------|
| <b>5</b> | $2.6 \pm 0.2$  | $1.1 \pm 0.04$                    | $2.8 \cdot 10^{-5} \pm 5 \cdot 10^{-7}$   |
| <b>8</b> | $0.3 \pm 0.2$  | $39.4 \pm 9.6$                    | $9.9 \cdot 10^{-5} \pm 4.0 \cdot 10^{-7}$ |
| <b>7</b> | $0.3 \pm 0.02$ | $25.1 \pm 7.4$                    | $7.8 \cdot 10^{-5} \pm 1.9 \cdot 10^{-7}$ |
| <b>6</b> | $1.28 \pm 0.7$ | $19.5 \pm 9.2$                    | $1.9 \cdot 10^{-4} \pm 4.0 \cdot 10^{-7}$ |

Table SI-2: Kinetic and thermodynamic parameters of the HPA-hexadecavalent glycoconjugate interactions.
